# Supplementary material for: A Genomic Evaluation of Six Selected Inbred Lines of the Naturalized Plants of Milk Thistle (Silybum marianum L. Gaertn.) in Korea
Source: MDPI journal article supplement (doi:10.3390/plants12142702), 2023-07-20
Supplement: s1 [file s1]

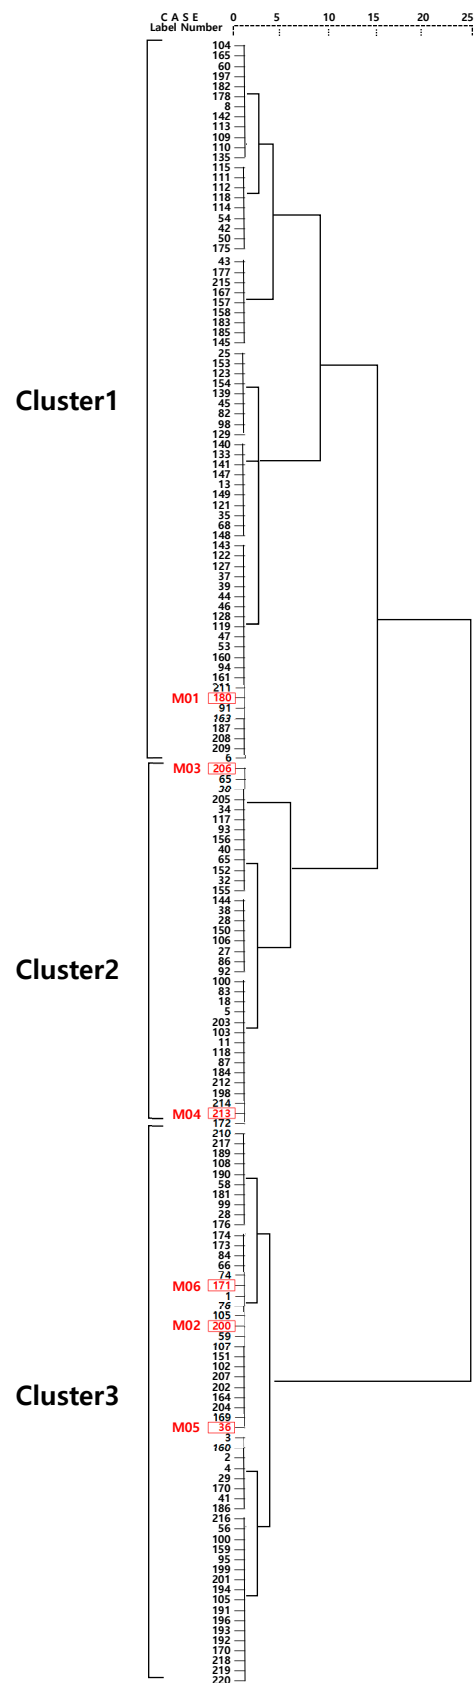

**Figure S1.** Hierarchical cluster analysis based on agronomical traits with dendrogram visualization by Ward's method using SPSS.

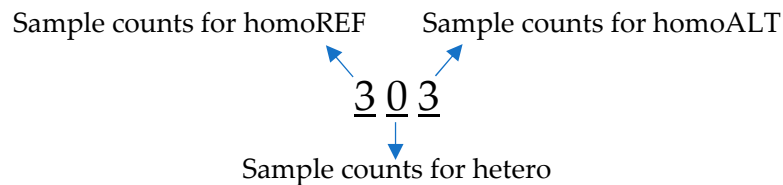

<Example>

| Contig name    | Position | Contig length | REF.                 | ALT.                                                                                  | M01 | M02 | M03 | M04 | M05 | M06 | Group | Length Difference |
|----------------|----------|---------------|----------------------|---------------------------------------------------------------------------------------|-----|-----|-----|-----|-----|-----|-------|-------------------|
| LMWD01002266.1 | 1251     | 24953         | T                    | TTGAAGTTATATGAAAAATAT<br>GGCATGATTGCTTGGGGTC<br>TAAGTTGAAGTTGAGATTGA<br>AGAAAATTAGAAG | 1   | 100 | 1   | 100 | 1   | 100 | 303   | -73               |
| LMWD01004760.1 | 5204     | 21997         | G                    | GTAACACTTACCCGGATAAGA<br>TTTGA                                                        | 100 | 1   | 1   | 100 | 1   | 100 | 303   | -25               |
| LMWD01005723.1 | 933      | 7867          | CATCTTTTAIGTTCAATTIA | C                                                                                     | 100 | 1   | 100 | 1   | 100 | 1   | 303   | 19                |
| LMWD01006025.1 | 4615     | 13411         | GAGGCAAGCTTCTTCCAAT  | G                                                                                     | 100 | 1   | 1   | 100 | 1   | 100 | 303   | 18                |

**Figure S2.** An explanation of the modified allele frequency used for indel classification. Sample genotypes were grouped by modified allele frequency which is represented by a polymorphic type of a three-digit number. The first number of three digits represents the number of accessions with homozygotes for the reference allele among 6 accessions, the second digit represents the number of accessions with heterozygote allele, and the third digit represents the number of accessions with homozygotes for the alternative allele, respectively.

**Table S1.** Correlations between six traits in the 220 milk thistle accessions. Six agronomical traits were evaluated: plant height (PH, cm), seed weight (SW, g), number of flower heads (FHN), SW/FHN, spine length (SL, mm), and plant color at harvest (PC). According to color charts, PC was estimated in three types: green (1), brown (2), and green-brown (3). \*\* $p < 0.01$ ; \* $p < 0.05$ .

|        |          |          |         |          |          |
|--------|----------|----------|---------|----------|----------|
|        | PH       |          |         |          |          |
| SW     | 0.750**  | SW       |         |          |          |
| FHN    | 0.738**  | 0.886**  | FHN     |          |          |
| SW/FHN | 0.572**  | 0.782**  | 0.499** | SW/FHN   |          |
| SL     | -0.264** | -0.242** | -0.105  | -0.340** | SL       |
| PC     | 0.433**  | 0.259**  | 0.223** | 0.218**  | -0.259** |

**Table S2.** Phenotypic variation of the six traits in six milk thistle accessions measured in 2019-2021. Means separated within columns followed by different letters were significantly different based on Duncan's test ( $P \leq 0.05$ ).

| Sample | Accession | Origin                | Plant height (cm) | Branch number | Involucre diameter (mm) | Flower head number | 100-achene weight (g) | Spine length (mm) |
|--------|-----------|-----------------------|-------------------|---------------|-------------------------|--------------------|-----------------------|-------------------|
| M01    | 932014    | Canada                | 111.6±9.6 a<br>bc | 19.6±0.7 ab   | 43.3±1.3 b              | 34.4±2.6 ab        | 2.1±0.1 d             | 9.6±1.8 c         |
| M02    | 932037    | Germany               | 96.3±2.2 c        | 16.4±1.1 b    | 46.7±1.4 b              | 24.2±1.1 b         | 2.6±0.0 b             | 15.6±1.3 b        |
| M03    | 932044    | North Korea           | 95.3±7.1 c        | 17.2±1.7 b    | 47.1±1.3 b              | 31.0±3.1 ab        | 2.1±0.0 d             | 10.0±0.8 c        |
| M04    | 932053    | Moldova               | 124.3±1.9 a       | 18.8±1.8 ab   | 55.8±1.6 a              | 31.4±3.3 ab        | 2.3±0.1 c             | 8.0±1.0 cd        |
| M05    | 912036    | Unknown (South Korea) | 120.3±4.3 a<br>b  | 17.4±1.0 b    | 48.3±2.2 b              | 39.8±3.3 a         | 2.8±0.0 a             | 22.2±1.0 a        |
| M06    | 912171    | Unknown (South Korea) | 101.0±4.4 b<br>c  | 23.4±1.7 a    | 44.3±0.9 b              | 31.2±3.5 ab        | 2.4±0.0 c             | 4.6±0.7 d         |

**Table S3.** Sequence read counts by preprocessing raw resequencing data and trimmed read data by fastq in six milk thistle accessions.

| Accession | Raw data    |                  | Trimmed data |                  | %     |
|-----------|-------------|------------------|--------------|------------------|-------|
|           | Total reads | Total bases (bp) | Total reads  | Total bases (bp) |       |
| M01       | 110,905,630 | 16,746,750,130   | 108,554,670  | 16,281,646,777   | 97.22 |
| M02       | 139,679,408 | 21,091,590,608   | 136,302,598  | 20,455,574,570   | 96.98 |
| M03       | 150,318,804 | 22,698,139,404   | 146,110,578  | 21,919,959,444   | 96.57 |
| M04       | 123,412,434 | 18,635,277,534   | 121,009,526  | 18,156,138,037   | 97.42 |
| M05       | 149,012,860 | 22,500,941,860   | 146,000,972  | 21,906,263,564   | 97.35 |
| M06       | 124,801,536 | 18,845,031,936   | 122,017,832  | 18,314,262,111   | 97.18 |
