# Supplementary material for: A Genomic Evaluation of Six Selected Inbred Lines of the Naturalized Plants of Milk Thistle (Silybum marianum L. Gaertn.) in Korea
Source: Plants (Basel). 2023 Jul 20;12(14):2702. doi: 10.3390/plants12142702 (PMC10384142; doi:10.3390/plants12142702)
Supplement: Supplementary file 1 [file plants-12-02702-s001.zip › Table S4_20230718.xlsx]

## Sheet: Table S4
Table S4. Details of the 198 InDel markers developed in this study.
No.	Primer ID	Contig	Fragment size (bp)		Forward Primer	Reverse Primer	Allele type
			Ref. (AA)	Alt. (BB)			M01	M02	M03	M04	M05	M06
1	SM001	LMWD01001057.1	244	213	TTTAGCCGAATTCCCCGTTC	AAGGGTTAACGGAGCACAAA	AA	AA	AA	AA	AB	AA
2	SM003	LMWD01003309.1	238	158	TGTGCAGGTCTAGGTTTCGA	TTTCTCCCTCCCAAGACTCA	CC	CC	CC	DD	CC	DD
3	SM004	LMWD01003536.1	158	89	AGTAGTCAGTGCGTTTACCAA	AACCCCATGTCCCCATTAAAA	AA	AA	AA	AA	AA	AA
4	SM005	LMWD01003567.1	227	297	CGTGGTAGTGGTTGGAGGAT	GACATGCTCCCTAACTCCCT	BB	AA	BB	BB	AA	BB
5	SM006	LMWD01003884.1	272	192	TGTGGCTTGTTTAGTGTATGCT	TCGAACATGGGGTAGATGGG	AA	AA	AA	AA	AA	BB
6	SM007	LMWD01005342.1	371	339	CCTGACCCGGACAATGTTC	AGTTGGCCCAAGAAAACACT	AB	AA	AA	AA	AB	AA
7	SM008	LMWD01005996.1	327	296	AAGTCCGTCTATTTTGAGGCT	TCTTAGGTTGCAAGATCTCGAGA	AB	AB	AB	AB	AB	AA
8	SM009	LMWD01006548.1	210	179	GTGATCGCGTCCACCATAAC	TCACCAACTCTGTACCAACTCA	AA	AA	AA	BB	AB	AA
9	SM010	LMWD01007273.1	252	289	AGGCGCTAATATCAAAACCTTTT	ACAGGGAAGATGTGATCGATAAC	AB	AA	AA	AA	BB	AA
10	SM012	LMWD01008102.1	171	202	CCAGCACACAATGTCCTTCC	TGTGGTTTGCTCCCTACGAT	AB	AA	AA	AA	AA	BB
11	SM013	LMWD01008546.1	225	291	AGAGCCTCTTAATCGTTCCG	ACGGCTATTGATGTCATGGC	AB	AA	BB	AA	AA	BB
12	SM014	LMWD01008546.1	249	96	TGGGAATCGGACAAGTGGTT	CAATAAGGCAATATACGCTCAGG	AB	AA	BB	AA	AA	BB
13	SM015	LMWD01009100.1	225	256	GCATCAGAGTTCGATTGCCC	GGGAGCGAAATGGACTGATG	AB	AA	BB	BB	BB	BB
14	SM016	LMWD01010287.1	449	561	ACAACCTTCATAGCCGATTACAG	CCCCAATGTGCTACCAAAGT	BB	AA	BB	AA	BB	AA
15	SM017	LMWD01010358.1	298	258	ACATGCATTTTGTCTTTCCGAG	GTGTCGCCTCTTCCTCTCTT	AA	AA	AA	AA	AB	BB
16	SM018	LMWD01010767.1	161	192	GAGGCCCAGGTGAGTAGC	TGAAAACATGGGCAAGCTTG	AA	AA	AB	BB	AB	BB
17	SM020	LMWD01011586.1	212	242	CTCCACATGACAGCTAACAAGT	CGGTTACCAAGGGCAAAACA	BB	AA	BB	AA	AA	BB
18	SM021	LMWD01012067.1	348	389	CAAGGTTGCTAGGACGCTTT	GGGTGGAATTCGAAAGTGGAC	AB	BB	AB	AB	AB	BB
19	SM022	LMWD01012737.1	229	149	CGTACCGGGTCTAGTCACAT	GGGATGCGTAAAAGTGACAGG	BB	BB	BB	BB	BB	AA
20	SM023	LMWD01012947.1	210	272	TCCCAGGTGAACTTGACAAG	TTACCGGATGAACATGGCAC	AB	BB	AA	BB	AB	BB
21	SM024	LMWD01013839.1	221	265	AGTAGGTTGCTATTTCTTGCTCT	TCACTACTCTATCCGTCCCAA	AA	AA	AA	AA	AA	AA
22	SM025	LMWD01014076.1	203	164	ACTAGCAGCGACTCTACAGG	GGGGTAGAGGCCACTTTGTT	AA	AA	AA	AA	AA	AA
23	SM026	LMWD01014371.1	246	208	AGTCGAAGTTGATGAGAGTTGA	AGTGATGGGGTTAGTTGAGAGT	AA	AA	AA	AA	BB	AA
24	SM027	LMWD01015034.1	291	201	GGGCTGCGTGAAATATTTTAAGG	TGCAAAGTCACATAGCCCCA	AB	BB	AA	AA	AB	BB
25	SM028	LMWD01015200.1	295	228	CTTCGACCAGATGAATCATAGCA	AGCAGTTTGAAGAAAATTCGACT	AB	AA	AA	BB	BB	AA
26	SM029	LMWD01017502.1	295	246	CGAAGGCGTGGGAAGATACT	CTGGACCTGAGGAAAGTAGACT	AA	AA	AA	AA	AB	BB
27	SM030	LMWD01020084.1	228	299	AATCCAAAACCGGCAGCTTC	TGGGTGAAGAAGCAAGACAC	AA	AA	AA	AA	AA	BB
28	SM032	LMWD01020785.1	226	268	CCATCTCTGACCTCCCCATC	AGAGCGATGAATCCCTATCCT	AB	AA	AA	AA	BB	AA
29	SM033	LMWD01021144.1	236	205	CCACAGTAATAACGTTGGTCTCG	TGAGAAGCGACAGATGGACG	AB	BB	BB	BB	BB	AA
30	SM034	LMWD01021885.1	444	639	GGAATGGGTATGTCGGCAAT	GCCTGTCGATGTTATGTCTACC	AA	AA	AA	AA	AA	BB
31	SM035	LMWD01022144.1	271	193	TCAGTTCGGCTTTAATCGTTCT	AGCCCGAACTGCAATTATCC	AB	AA	BB	BB	AA	BB
32	SM036	LMWD01022234.1	370	474	TGCCTCAAGTGACTGACATT	TGTTGTCGAGGTGGTATCCA	AA	AA	AA	BB	BB	AA
33	SM037	LMWD01022541.1	351	246	GATGTATCTCGCTGCATTGTG	CACAACGTGTATACAGTGGGT	AA	AA	AA	AA	AA	BB
34	SM038	LMWD01024106.1	262	298	GACAGGGAGTGGATTTTGATGT	CCTTCACTTTCTCTCATGTTCCA	AA	AA	AB	AA	AB	AA
35	SM039	LMWD01024681.1	239	177	TAGCAACAAGAGCAAGGGGA	TGAGCTGAGCAAGAACGAGA	AB	AA	AB	AB	AA	AB
36	SM040	LMWD01026529.1	240	195	ACAGTCATTTGAGGAGCTCTACT	TGCATGCAAGTGGAATAACTCA	AA	BB	AA	BB	AA	BB
37	SM041	LMWD01026832.1	455	276	TGTGCGTTTGTCCATTTCGT	TGGCTTTCTAGTCTATCCGTCT	BB	BB	BB	BB	AA	BB
38	SM042	LMWD01026958.1	236	272	ACTATGTAAACACTTGGTCCGT	AAATCCACAAACAGCCATGAG	AB	AA	BB	BB	AA	BB
39	SM043	LMWD01026958.1	241	297	TGACGGAAAGAGCTAGTACAGA	TGCGTACTTCAAGGTGGAGA	BC	BC	CC	CC	BC	CC
40	SM044	LMWD01028064.1	189	224	CTTCTGAGCCTCCAAATCGC	TGAACCGTAAGCCCTGGAAA	AB	AA	BB	BB	AA	BB
41	SM045	LMWD01028232.1	228	164	ATTTGTCCGGTATGCACACA	GATTCTCATTCTCTGACCATGCT	BB	AA	BB	AA	BB	AA
42	SM046	LMWD01028458.1	248	287	AACTTTCCTTTTCACACGATTGA	ACTTTTGGATGGAGTTTTGTGC	BC	BB	BB	BB	BB	BB
43	SM047	LMWD01028523.1	286	332	CGAAGTCTTAACGGGAGAAAAGT	ACAAACTGGACGAAGGGTAC	AB	AA	AA	AA	AC	AA
44	SM048	LMWD01028523.1	462	519	AGTGGCTGTATCTTCCTTAGTGA	AGGTCGGTTCTTAGATGACAGT	AA	AA	AA	AA	AB	BB
45	SM049	LMWD01029688.1	250	295	CCTCATTGGGGTCTTGAAGT	CGGCGAGACTGGGTAGAATT	AA	AA	AA	AA	BB	AA
46	SM050	LMWD01030916.1	226	175	CTAGACGAGGGTATTGTATGCA	AGTGTATTTGGTGGGAGGGG	AA	AA	AA	AA	AA	BB
47	SM051	LMWD01031020.1	187	139	TCCTTTATTGCATCACACAGGT	TGGGTCCGAGAACTACGATG	AB	AA	AA	AA	AB	AA
48	SM053	LMWD01031212.1	442	504	CGCATCGTTTAATGGAAGACAA	ACCGTCACAAGTCAAAACCT	AB	BB	AA	BB	AA	BB
49	SM054	LMWD01032946.1	448	362	CTTACGCAATAGTCGGTGGG	GGCTACCCGAAAACACTTGA	BB	BB	BB	BB	BB	AA
50	SM055	LMWD01035167.1	672	642	CGGATGCCAAGCCATGTTAA	ACAAGGAAACACAAAGAGCAGT	BB	BB	BB	AA	BB	AA
51	SM056	LMWD01035642.1	364	287	ACCGTGTGTCTCTTGAAATTAGT	AGTGCATGCGTCTACTCTTT	AB	AA	BB	AA	BB	AA
52	SM057	LMWD01036013.1	220	184	TGTGCGGCCCTCAATGAC	GCTTTGAGTACGTTGGCCAT	AA	AA	AA	AB	AA	AB
53	SM058	LMWD01036013.1	244	147	ATGCTCACCCCTAACACCAA	GGTCCAGAGATGAGCGGATT	AB	AA	AA	AA	AB	AA
54	SM059	LMWD01036480.1	237	120	AACATCTTCAGAGGCACCCA	CGAAGAACCTTCAGTGTCGG	AA	AA	AB	AA	AA	AB
55	SM060	LMWD01036480.1	217	179	AGTGTGCCCTGACAGATGAA	GCAAATCCATTCACACAAGGG	AB	AB	BB	AB	AB	BB
56	SM061	LMWD01036569.1	818	851	GCGGTGGAATCTCAAATCTAGA	AAGGCATTGACAAAGGGTGG	BB	AA	AA	BB	BB	AA
57	SM065	LMWD01038957.1	185	135	CCTTGCAACGATCTTGTCCA	CGGAATGGAAATGGGAGCAC	AA	AA	AA	AA	AA	AA
58	SM066	LMWD01040044.1	247	207	AACCGCTCTCCTAGATCCAA	GTCCGTTCCTGCTAACAAGC	AB	AA	AA	BB	AA	BB
59	SM067	LMWD01040309.1	190	221	GGCCAGTCTCCCTTACCAAA	CTCAAAGACTCAGGTTGCACA	AA	AA	AA	AA	AA	BB
60	SM068	LMWD01040446.1	529	588	GCGAACTTTACAAATGCACGT	CGTGAAGCCGATTAAACTAGC	AA	AA	AA	BB	AA	BB
61	SM069	LMWD01041474.1	196	158	TAAGAGGCAAGCAACAGGTG	AATGTGTATTTGGGCTTGCAAA	AB	AA	AA	AA	AA	BB
62	SM070	LMWD01041474.1	189	220	ACTTACAGAGGGGCCGAAAA	TTCTAAACATGGCCCGCAAG	AA	AA	AA	AA	AA	BB
63	SM071	LMWD01043206.1	205	165	CCTCACTCTCACCAGACCTG	TCCCATTTTCACCCTCCTTGA	AA	AA	AA	AA	AB	BB
64	SM072	LMWD01043485.1	164	119	TGAATTCAAGCGCCACCAAA	ACCGTGAATTTTGGAGCCAA	AB	AA	BB	AA	AA	BB
65	SM073	LMWD01045247.1	464	390	GCTGATCTGTTTGGTTATACTCC	TCCCTTTCCTTTCCCTCCAA	AB	AA	BB	BB	AA	BB
66	SM074	LMWD01045516.1	221	127	GTTGAGAACCGCGAGAAACA	GGTGCGTTAGTTCCGGATTC	BB	AA	BB	BB	BB	AA
67	SM075	LMWD01045637.1	478	415	CGGATTTCCTCATCTGGTTATCA	TGGTATCACAGCCAAATCGAAG	BB	AA	AA	BB	BB	AA
68	SM076	LMWD01046202.1	400	456	CCTTATTTCAACCTTCAACCGG	GTAGCATGCACATAACAACGT	AA	AA	AA	AA	AA	BB
69	SM077	LMWD01046626.1	167	112	GCTAATTTTCGTAGGCCCGT	GAACCCGAACCGAAAACTCC	BC	BC	AA	AA	AB	CC
70	SM078	LMWD01048665.1	208	168	AGTGAGGTAGGTGGTGAACG	CCGAGACAGGACATGATTGAG	AB	AA	AA	AA	AA	BB
71	SM079	LMWD01053664.1	199	157	TCAATACAACAGCCCTTTGGA	TTGTTGGTGGTCAGGTTTCG	BB	BB	AB	BB	BB	AB
72	SM080	LMWD01053850.1	220	279	ATTGTTAACGTGTGTGTATGCAT	TGATCCTGTGGTTTTCATGTTGT	AA	AA	AA	AA	CC	AA
73	SM083	LMWD01058869.1	478	594	GAAATCGGTGTGGAAAACGG	AGGATTGTTGTTTGACCGATCA	AB	AA	AA	AA	AB	AA
74	SM084	LMWD01059276.1	291	244	GCCAACAAAGTCAACATTACGC	TCGGAGTTGGTATCATCCCTG	AB	AA	AA	BB	CC	BB
75	SM085	LMWD01059526.1	221	283	ACGAAACTGTTAGGATCCGAAG	TCAACAAACCCCTACCTCTGA	CC	CC	CC	CC	AA	CC
76	SM086	LMWD01060440.1	230	166	CTTGTCATTTACCTTCCCGCA	ACACCCAAAGTTAAGGCGAT	CC	CC	BC	BB	CC	BB
77	SM087	LMWD01061036.1	241	271	AAAAGCATGTGAAAGGTCGAAT	ACCGAAATGCACCGAATCAA	AC	BB	AA	AA	CD	DD
78	SM089	LMWD01062244.1	332	373	AGCAACCGTCAGTCTTTTGG	TCCAGAATAACGGTGCCTGT	AB	BB	AA	AA	AA	BB
79	SM091	LMWD01063012.1	249	212	GGCATTGAACCTCACAACAAA	GGGGAGAAGAGGCTACAGTT	AB	AA	AA	AA	AB	BB
80	SM092	LMWD01063487.1	166	120	TTGGGTTGGACTCTAGGACC	TACATATGGGTCCCGATGCC	AB	AB	AB	AB	AB	AB
81	SM093	LMWD01063889.1	353	321	AGGTGCTGAAGTCTGAAGTCT	GGTTGGCCGTATTGAATATTCTT	AA	AA	BB	BB	AA	BB
82	SM094	LMWD01065718.1	219	267	AGGGGTGTTACATATGGGGA	ACAACGCACTCCAAACATGT	AA	AA	AA	BB	AB	AA
83	SM095	LMWD01065755.1	216	142	TGGTTTATTTTGGTTACACGCCT	TCTTTTCTCATCGTGTTCACCC	AA	AA	AA	BB	AB	AA
84	SM096	LMWD01065845.1	166	126	CTGGAGAAGATAGGCGTGCT	ATAAAGTGGCGCAAAGTCGG	AA	AA	AA	AA	AA	BB
85	SM097	LMWD01067494.1	248	215	TCCCCAACCAGCGTTATGAT	AGGGAGTCGTGGTTGAACTT	AB	AA	AA	BB	AA	BB
86	SM098	LMWD01068501.1	246	216	GCATCCGCCCATGTGTGTAA	AGAAGTAGCTGTTGGAGTTGGA	AB	AA	BB	BB	AB	BB
87	SM099	LMWD01071061.1	500	437	TGTGTACTGAAAAGATCCCTGAA	TGGACTTGTGGTGTGACTGT	AA	AA	AA	AA	AA	AA
88	SM100	LMWD01071547.1	216	252	TTGTAAGGCGGGTCGTGTT	ATCATCCCTTACCCGTACGC	AA	AA	AA	AA	AB	AA
89	SM101	LMWD01072681.1	225	262	ACGTTTTCACAAATCTGGGTTG	CACACGTAGGGGCCTCTTTA	BB	AA	AA	AA	BB	AA
90	SM102	LMWD01073932.1	168	225	GCGCAATACATGGTCGGAAT	AAAGGTTGGTGCAAAACTGC	AA	AA	AA	BB	BB	AA
91	SM103	LMWD01073953.1	361	393	TGCAAACCAAGTTACCAACCA	TGCAAGATGACTAGGTTAAGGGA	AA	BB	BB	BB	BB	AA
92	SM105	LMWD01079194.1	228	164	ACGAAAACAAGATTCAAACCCA	AGCGATGTAAAATCCAGATCCA	AA	AA	AA	AA	AA	BB
93	SM106	LMWD01079706.1	215	257	GCGCATAACTTGAAAACGTGT	AGGACAATTTTGCACGTTTTAGC	AA	AA	AA	BB	BB	AA
94	SM107	LMWD01079746.1	277	343	TCACAACTTATTCGGTCAGCC	GGTTGTTTGGTTGGCTTTTCG	BB	BB	BB	BB	BB	AA
95	SM108	LMWD01080752.1	236	159	CATCCAAAGTTTCTTAAGTGCGA	TGCGTCTATACACCCCAACA	AA	AA	AA	AA	AB	AA
96	SM109	LMWD01081327.1	247	186	AACAGGGGATTCAGGCTCAG	TCCCCATTCTCAGTGATCCA	AB	AB	AA	AB	AB	AA
97	SM110	LMWD01084187.1	160	199	CCTCGCACTGAAACAACTCC	AGCCTCAACTTCATCCCACA	BB	BB	BB	BB	BB	BB
98	SM111	LMWD01085790.1	291	183	TCCTGTCTAATTTACAACCACCA	CTTCATGGTGTTCTTATTGCTCA	BB	BB	BB	BB	AA	BB
99	SM112	LMWD01087558.1	175	127	ACCAATCACTACCGACCACC	GGTCACATAACGTAGCTCTGG	BB	AB	BB	AB	BB	BB
100	SM113	LMWD01088398.1	296	254	TCGATTTGTTGACTATCCTCGT	AAAAGCGGTCATTCATTCTTCAA	AB	AA	AA	BB	AA	BB
101	SM114	LMWD01088822.1	846	896	TGTTGGACAGTACACGACAGT	CGAGGCGGAGGTATTCGTAT	AA	AA	AA	AA	AA	BB
102	SM115	LMWD01089084.1	156	98	GTTACGGTTTCAATTGCATCCA	TGAGAGGGAGAGTGGATACCA	BB	BB	BB	AA	AA	BB
103	SM117	LMWD01089585.1	248	200	CTCCACTATCTTGAGACCTGGA	TCAACACGTCACCCAACAAT	BB	AA	BB	AA	AA	BB
104	SM118	LMWD01089911.1	205	153	CGAAAGGTGCCAACTCTCAC	CGCATTCGTGGTGATAATCCC	AA	AA	AA	AA	AA	AA
105	SM119	LMWD01090879.1	365	325	CCGACTCACACTTTAGCGAC	CCCAGAGCCCAAATCCATCA	BB	AA	AA	AA	BB	AA
106	SM121	LMWD01091941.1	485	449	GAACACATCCACACAGACACA	TCTGAATATGACACGTATCGCAC	BB	BB	BB	BB	AA	BB
107	SM122	LMWD01092818.1	226	186	TCAAGGTTTAGAGTCGCCGT	AGACTTTGTGTTTGACGTTTGT	AB	AA	BB	BB	AA	BB
108	SM123	LMWD01094414.1	216	153	TGAACCAAGTTACGAGTCAAGT	ATGGGCCTGATACATACGCT	AA	AA	AA	AA	BB	AA
109	SM124	LMWD01096299.1	380	423	TGCGTCAATGTCACTTTATCCT	TACAGTACCCAAACCCACGG	BB	BB	BB	BB	BB	AA
110	SM125	LMWD01097380.1	250	220	CAAACACGACAGACTTTGGC	GGTAACCATAGACCCCATTTGT	BB	BB	BB	BB	AC	BB
111	SM126	LMWD01097523.1	222	252	ACTCACCAACTTTTGTGACGG	TTTGTGTGTATGGCCTTGGC	AB	BB	BB	BB	AA	BB
112	SM127	LMWD01097523.1	346	380	CCAAGCGCCTAACACTCATT	TCAACCCTAATGCCTACACCT	AA	AA	AA	AA	AA	AA
113	SM129	LMWD01097933.1	195	229	TGAGACTGGGAGAGAGTAAAAGA	CTGGAGCTAGGTGTCGGTAG	AB	AB	AB	AB	AA	AB
114	SM130	LMWD01097933.1	225	190	CGACTTTTATGCCTATGGACCC	TTCCTTGAAATGTTGAAACGAGT	AB	AB	AB	AB	AA	AB
115	SM131	LMWD01098081.1	214	180	ACGACAAAACAGAATACAAGCG	ACACCGTATGACATATGCCCT	AB	AA	BB	AA	AA	BB
116	SM132	LMWD01098901.1	212	150	CCGGAAGAGGAGAAGACAGG	CTTCGCCCTTATAGAGCCCA	AA	AA	AA	AA	AB	AA
117	SM133	LMWD01099277.1	246	190	AGTTGTTTCCACCTTTAACGCT	TGCCCAACACTATTCAATGGT	AB	AA	AA	AA	AB	AA
118	SM134	LMWD01101596.1	223	184	AGGTTTGTTCTCCCATCATGT	CGAGCCTGGTATGATCGTCT	AA	AA	AA	AA	AA	AA
119	SM135	LMWD01101944.1	249	280	CCCGTGGGTAATCAGATTTGT	TCCTCAGCATACCTTGACGA	AA	AA	BB	AA	AA	BB
120	SM137	LMWD01105230.1	178	139	AGGGATCTCTTGCTTTGGGT	CATCCCCTCAACCTCAACCT	AA	AA	AA	AA	AA	AA
121	SM138	LMWD01105924.1	314	366	TCACGACATCTAGCCAAGGT	GTCGGTTGTTGGCTTCACAA	AA	AA	AA	BB	AB	BB
122	SM139	LMWD01106691.1	218	273	TGAGGTTGGCAATGGTAATGT	TCGTGGACCAATGTTACAGTC	AA	AA	AA	AA	AA	BB
123	SM140	LMWD01107623.1	161	194	GTTTTACAACCACCCTACCCA	CCAAAGACAAATCGGCCTTTAT	AA	AA	AA	AA	AA	BB
124	SM141	LMWD01109292.1	188	158	GGTTACTATGGTGTTCGTCGG	TCAAAACCGTGAGAACCAGT	AA	BB	AA	AA	AA	AA
125	SM142	LMWD01109331.1	193	225	TGCTCGGGTGACTTGTAGAG	TTCATCCTAAGGGCTCGACA	BB	BB	BB	BB	BB	BB
126	SM143	LMWD01109927.1	294	327	TCCTGCATGATTTTGTTTAGGGA	GCACGGATGATAATGGATTCTCT	AA	AA	BB	AA	AA	BB
127	SM144	LMWD01114314.1	400	365	CCAACTTGCATGAACCTGGA	TTCAAGTCTCCTCAGGGCC	AB	AA	AA	BB	AB	AA
128	SM145	LMWD01115801.1	152	122	CACAAATCTAGCGGGCTGAA	TCCAGGCCTTGACAATCTGA	CC	CC	CC	CC	CC	CC
129	SM146	LMWD01115875.1	163	193	AGGTGTATGAGTGCGGTCAA	CGCACCTCATCGCCAAAATA	AB	AA	BB	AA	AB	AA
130	SM147	LMWD01117334.1	238	191	CAAAGCCTGGATCGACAAGC	AGCAGAGTGTGACAACCCTT	AB	AA	BB	BB	AA	BB
131	SM148	LMWD01118215.1	368	399	GGAACCGAACCACAAAACCA	AGGGGTGGGTTCAAATGAGA	AA	AA	AA	AA	AA	AA
132	SM149	LMWD01119915.1	238	183	AGGAGGAGAGGATGGAGTGT	TGATCCAAAGCCGATGAAGG	AB	AA	AB	AB	AA	BB
133	SM150	LMWD01121090.1	265	323	TGTTTCCTTAGTCGTTTCTCTGA	GGCGGATGTGTTCTTTGGTT	AB	BB	BB	BB	AB	BB
134	SM151	LMWD01122163.1	279	184	TCCTAACCCTAGCTTTGTGAGT	TTCCCAACACCGAAAACCTT	CC	CC	CC	CC	CC	CC
135	SM152	LMWD01122213.1	206	243	TGCCAATCGACAGTTTCAGC	CCCAAAACCCGGACAACTTA	BB	AA	BB	BB	AB	BB
136	SM153	LMWD01130578.1	590	622	AGGAGAGAAATGAAGGGAAATGA	TTGGGGTAATGGGGAGTGAC	BB	BB	BB	BB	BB	BB
137	SM154	LMWD01132286.1	206	245	CCACGCCCTTAATCAACCAC	GCACCATGACGATTTCCCTG	BB	AA	BB	AA	BB	AA
138	SM155	LMWD01134189.1	299	268	AGAAGTTATCATGTTTTCCGGGT	CCATGTAACCCCTTTCGATGG	CC	CC	CC	CC	CC	DD
139	SM157	LMWD01135572.1	200	249	TCGGCTATGTAGGTTCGTCC	ACCACAATCGATCAATCCTACA	CC	CC	CC	CC	CC	AA
140	SM159	LMWD01138190.1	172	203	TCATTGGCCTTGTACGCATG	CAAAGGAGGAGGCAGGAAGA	BB	BB	BB	BB	BB	AA
141	SM160	LMWD01139992.1	471	427	ACCAAGTATCGCACCAATTTGT	CCTCCACACTTGAACCTCGA	BC	BB	BB	BB	CC	AC
142	SM161	LMWD01141296.1	239	205	TGCCTGCGATCCTAGAGAAG	CGTGCCTTTTATATTCTACGTGT	AB	AA	AA	AA	AB	AA
143	SM162	LMWD01141315.1	598	630	TCCCAACAATGTGAAAACACCT	AAGTGGCGTAATTGGAGCAT	AA	AA	AA	AA	BB	AA
144	SM164	LMWD01146413.1	196	240	TAAACACACACACGCACACA	TGTCAGAGAGGGGAAAGACT	AB	AA	AB	AA	AA	BB
145	SM165	LMWD01147959.1	174	138	TCATCGGGTTGGATTTAGTTCA	CTTCCCCTTTCCTTTGCACC	AB	AA	AB	AA	AB	BB
146	SM166	LMWD01149055.1	321	267	CCACAAGAGGAGTTAGTTGACC	AAACACCCAGGAAGCGTTTC	AB	AA	AA	AA	AA	BB
147	SM167	LMWD01150476.1	247	464	ACATCATCTCGGTCAAGTATACC	AGAAAAGGGGAAATTCAGAGTGT	AB	AA	BB	AA	AB	BB
148	SM169	LMWD01153933.1	500	535	TACCAAACGTTTAACCGGGG	AAGTTGCGGGAAAAGTCGTG	AA	AA	AA	AA	AA	BB
149	SM170	LMWD01159523.1	248	178	ACTTTCTTAGGTTCTAGCATGCT	GTACCTGTGGCCCAACATTC	AA	AA	AA	AA	AB	AA
150	SM171	LMWD01159702.1	292	244	ACACGGATTGGTCGATTCTT	GTCAAATTGTTCAATTGCATGGC	AA	AA	AA	AA	AB	BB
151	SM172	LMWD01161589.1	150	219	TGTACCTGTCACTCACCTTTGA	CGCGAAAGAAAACGAACGGA	AA	AA	AA	AA	AA	BB
152	SM173	LMWD01161620.1	357	409	ACTCAATGGTTAGTTCCTAGGGT	CCCAAAGTTAGGTCAAAGTGGT	AA	AA	AA	BB	AB	BB
153	SM174	LMWD01162258.1	210	166	AAAATGCACTCTTTGTTCTCCAA	GAGGTATCACACGTGCTCCT	AB	AA	AB	AB	AA	AB
154	SM175	LMWD01165636.1	184	217	GCCAAAACCACACAACTCCT	TGATCTGACTCGTGGTTGGT	AB	AA	AB	AB	AB	AA
155	SM176	LMWD01170062.1	213	177	GTCGTCCGTCCAACTAAACC	AGGTCACATGGTCACACGAT	BB	BB	AA	BB	AA	BB
156	SM177	LMWD01170156.1	204	271	TGCCAAGTGATGATGGTCCA	TGATTGGGGTGGATGCAGAT	AA	AA	AB	AA	AB	AA
157	SM178	LMWD01170165.1	199	153	GCATTTGTTCAATAGCCTCAACT	CAAACTCAAGATAAGCCATTGGA	AA	AA	BB	AA	AA	BB
158	SM179	LMWD01171529.1	467	404	GTCAGGTCAACGAAACGGAC	TGACGAGGACTCACTGGAAA	AA	AA	AA	BB	AA	BB
159	SM180	LMWD01171852.1	372	297	CGCCAAAATCTTGTAAGCATCC	ACGTCACTAATTTCTGAGCGTC	AA	AA	AA	AA	BB	AA
160	SM182	LMWD01179016.1	249	383	ACTAGGAGCGGGTTCATACG	AGTTTGGAGTTTACGATACCCA	BB	AA	AA	AA	AA	BB
161	SM183	LMWD01183999.1	639	579	TTTCGCCTACCACGTTGTTG	CGTGTCGTCTATGTCACCTC	BB	BB	BB	BB	BC	CC
162	SM185	LMWD01188515.1	366	334	TCCCGAGATGTCCAAAATGTC	GGCCCAACCCATTCTGATATC	AB	AA	AA	AA	AA	BB
163	SM186	LMWD01192622.1	227	163	GGCTCTCGATGATCCTAGCT	CGTTTAAGTCATCGAGGGCC	AB	AB	AB	AB	AB	AB
164	SM187	LMWD01193137.1	248	198	TCAAGGGCTATTCGGTTTGT	ACTGCCGACTGATTTGAACA	AB	BB	BB	BB	AB	BB
165	SM189	LMWD01194123.1	234	290	AGTGCGGAAGAAAACATGCA	TGCTGTTGATTTGTAGCTTAGGG	AB	BB	BB	BB	AA	BB
166	SM191	LMWD01194445.1	249	279	TTGGATGATGTCAGGTTTGTTAC	ACTTTCACAGCAAAATCGAAACA	AA	AA	AA	AA	BB	AA
167	SM192	LMWD01196258.1	236	287	CCGGGGCAATATCACACATG	GATCCCCGTCCGTAAATCCT	AB	AA	AA	BB	AB	BB
168	SM193	LMWD01201578.1	228	158	CTAAGTGCACCGCTAATTTACG	ATGGGTGCAAGATCTGGTTG	BB	BB	AB	BB	AB	BB
169	SM194	LMWD01202098.1	259	291	TGTCTCTGAAATCCCCATCTCA	ATTGGATTTTCACCGCTGCT	BB	BB	AB	BB	AA	BB
170	SM195	LMWD01203326.1	242	335	AGGAGGGTGACGACTTTTACA	TTTACTCAAACACTTACCCCAGT	AA	AA	AA	AA	AA	AA
171	SM197	LMWD01204859.1	250	296	TCACTACTTCCCGTTTCGCT	CCGTCCACTAACTTATCAGCT	BC	CC	AC	CC	AA	CC
172	SM199	LMWD01206117.1	198	238	TTCTGCCCTTCTCTCGTCTC	ACTTACTGTTGGAGGCTTGGA	AB	AA	AA	AA	AB	AA
173	SM200	LMWD01207920.1	150	208	GCAATTGCGAACTTGATGGC	AATTCACGTTTGTAGCATTCCG	AB	BB	AA	AA	AB	BB
174	SM201	LMWD01208839.1	281	359	CCAAACGCACCCTAAACTACC	TCGATAGGTTGGTCTCACGT	AA	BB	AA	BB	AA	BB
175	SM202	LMWD01209551.1	163	194	AGTATAATGGTGGTCAAACGTGA	GCTTTACCACTAGCCACGTA	BB	BB	AA	AA	AB	AA
176	SM203	LMWD01216078.1	211	310	CCAACTGGTGCAATGAATTCAG	GTGGTGTGCATCAATGAAGC	AA	AA	AB	AA	AB	BC
177	SM204	LMWD01216305.1	182	289	GGAAGGGGAAAGGTGGAAGA	GCATCCCGTAATTGAGAACAGT	AB	AA	BB	AA	AA	BB
178	SM205	LMWD01217770.1	434	402	AGGGATGAGGAACGAGGAGA	ACCCAAGTCAAACCAAAAGCA	BB	BB	AA	AA	AA	AA
179	SM206	LMWD01218401.1	242	381	AGGATGACTCAGAAGGGTGAC	GGAATGTAGCAGACTCCTCCA	AA	AA	AA	AA	AB	AA
180	SM207	LMWD01218945.1	177	225	ACGGTCATTTGGAATGGTCA	TGTACGGTTCCATCTTCTTGAA	AA	AA	AA	AA	AC	AA
181	SM208	LMWD01223898.1	177	141	ACGGTCATTTGGAATGGTCA	TGTACGGTTCCATCTTCTTGAA	AA	AA	AA	AA	AB	AA
182	SM209	LMWD01228056.1	184	136	GAGTGATCTCGTTCGGTTGC	AAAGCCGGAGAGACACTTGA	AB	AB	AB	AB	AB	AB
183	SM211	LMWD01230402.1	449	419	GCCTACCGCTTTCCTATCAA	AGCGGGGTGTGACAATTTTC	AB	AA	BB	BB	AA	BB
184	SM212	LMWD01231417.1	249	281	ACCTGACCAAGACGAACCTT	TTTGCCGCCTTATGTCAAGC	BB	AA	AA	AA	BB	AA
185	SM213	LMWD01233354.1	236	352	GGTACCGAGCATGACGTAGA	AACCAAAACCGACCCCAATG	AA	AA	AA	AA	AA	AA
186	SM214	LMWD01236399.1	211	170	CGTGGGTTCAATGGATGCAT	TTTGCGTGATCTTGTTCGGT	AA	BB	BB	BB	BB	AA
187	SM215	LMWD01238040.1	358	534	GGTGTTTGGTTGGAGGTTGT	AGCTGTTTACTTGTCGCTTGT	BB	BB	AA	AA	BB	AA
188	SM216	LMWD01240082.1	237	206	ATTTTGGTAAACGGCCCCTG	CCAAACAACCCCTAGCCTCT	AB	BB	AB	BB	AB	AA
189	SM218	LMWD01241141.1	496	435	TGATCTTGACACCAATTTCAGCT	TCGGTATGTGCTTACTGGGT	BB	BB	AB	BB	AB	BB
190	SM219	LMWD01241265.1	246	212	CTCATGCTTTCCAAACGGCT	TGGTAGAGACGGCGAGTTTT	BB	BB	AA	AB	AB	AA
191	SM220	LMWD01244861.1	365	405	ACATTCCCATTCCGTAACGT	ACCAGCACTATCAGTAAGAACAT	BB	AA	BB	BB	AB	BB
192	SM221	LMWD01245683.1	232	200	CCCGGACACATTCTCTACCA	ACCTTCACAAGAGAGTCAGCA	AB	AA	AA	AA	BB	AA
193	SM222	LMWD01246654.1	220	182	TGAGGAGGCGGCTGATTTTA	ACTGTTTCACATCCTCCGGT	AB	AA	AB	AB	AA	AB
194	SM223	LMWD01247181.1	239	208	TTTTCTGGACTGACGTTGCC	CCAGAAGCAAACCATTACCCA	BB	BB	BB	BB	CC	BB
195	SM224	LMWD01248872.1	288	245	AGCAAGTGAGAAATGAGAGAGAT	TTCAACGGAACCAAACCCTT	BB	AA	AB	AA	BB	AA
196	SM226	LMWD01251888.1	285	209	GGTGATTTCAGATGTACCATCCA	CCCAACCCCTTCCTCAAGAA	AA	BB	AA	AA	BB	AA
197	SM228	LMWD01253881.1	239	380	TTCATCGACCTGGGGAAACT	GTTCCATCTAATGCTCCTAGGC	AA	AA	AA	AA	AA	AA
198	SM229	LMWD01255698.1	388	267	GGAAGTCGGATGTAGTGTTGC	GGCATAACTTCTGAGGTGGC	AB	AB	AB	AA	AA	AA
