# Supplementary material for: A Genomic Evaluation of Six Selected Inbred Lines of the Naturalized Plants of Milk Thistle (Silybum marianum L. Gaertn.) in Korea
Source: Plants (Basel). 2023 Jul 20;12(14):2702. doi: 10.3390/plants12142702 (PMC10384142; doi:10.3390/plants12142702)
Supplement: Supplementary file 1 [file plants-12-02702-s001.zip › Table S5_20230720.xlsx]

## Sheet: Table S5
Table S5. Passport data of Silybum marianum collected in this study.
No.	Accession name	Genus name	Country of origin	IT No. of RDA genebank
1	912001	Silybum marianum	Korea
2	912002	Silybum marianum	Korea
3	912003	Silybum marianum	Korea
4	912004	Silybum marianum	Korea
5	912005	Silybum marianum	Korea
6	912006	Silybum marianum	Korea
7	912007	Silybum marianum	Korea
8	912008	Silybum marianum	Korea
9	912009	Silybum marianum	Korea
10	912010	Silybum marianum	Korea
11	912011	Silybum marianum	Korea
12	912012	Silybum marianum	Korea
13	912013	Silybum marianum	Korea
14	912014	Silybum marianum	Korea
15	912015	Silybum marianum	Korea
16	912016	Silybum marianum	Korea
17	912017	Silybum marianum	Korea
18	912018	Silybum marianum	Korea
19	912019	Silybum marianum	Korea
20	912020	Silybum marianum	Korea
21	912021	Silybum marianum	Korea
22	912022	Silybum marianum	Korea
23	912023	Silybum marianum	Korea
24	912024	Silybum marianum	Korea
25	912025	Silybum marianum	Korea
26	912026	Silybum marianum	Korea
27	912027	Silybum marianum	Korea
28	912028	Silybum marianum	Korea
29	912029	Silybum marianum	Korea
30	912030	Silybum marianum	Korea
31	912031	Silybum marianum	Korea
32	912032	Silybum marianum	Korea
33	912033	Silybum marianum	Korea
34	912034	Silybum marianum	Korea
35	912035	Silybum marianum	Korea
36	912036	Silybum marianum	Korea
37	912037	Silybum marianum	Korea
38	912038	Silybum marianum	Korea
39	912039	Silybum marianum	Korea
40	912040	Silybum marianum	Korea
41	912041	Silybum marianum	Korea
42	912042	Silybum marianum	Korea
43	912043	Silybum marianum	Korea
44	912044	Silybum marianum	Korea
45	912045	Silybum marianum	Korea
46	912046	Silybum marianum	Korea
47	912047	Silybum marianum	Korea
48	912048	Silybum marianum	Korea
49	912049	Silybum marianum	Korea
50	912050	Silybum marianum	Korea
51	912051	Silybum marianum	Korea
52	912052	Silybum marianum	Korea
53	912053	Silybum marianum	Korea
54	912054	Silybum marianum	Korea
55	912055	Silybum marianum	Korea
56	912056	Silybum marianum	Korea
57	912057	Silybum marianum	Korea
58	912058	Silybum marianum	Korea
59	912059	Silybum marianum	Korea
60	912060	Silybum marianum	Korea
61	912061	Silybum marianum	Korea
62	912062	Silybum marianum	Korea
63	912063	Silybum marianum	Korea
64	912064	Silybum marianum	Korea
65	912065	Silybum marianum	Korea
66	912066	Silybum marianum	Korea
67	912067	Silybum marianum	Korea
68	912068	Silybum marianum	Korea
69	912069	Silybum marianum	Korea
70	912070	Silybum marianum	Korea
71	912071	Silybum marianum	Korea
72	912072	Silybum marianum	Korea
73	912073	Silybum marianum	Korea
74	912074	Silybum marianum	Korea
75	912075	Silybum marianum	Korea
76	912076	Silybum marianum	Korea
77	912077	Silybum marianum	Korea
78	912078	Silybum marianum	Korea
79	912079	Silybum marianum	Korea
80	912080	Silybum marianum	Korea
81	912081	Silybum marianum	Korea
82	912082	Silybum marianum	Korea
83	912083	Silybum marianum	Korea
84	912084	Silybum marianum	Korea
85	912085	Silybum marianum	Korea
86	912086	Silybum marianum	Korea
87	912087	Silybum marianum	Korea
88	912088	Silybum marianum	Korea
89	912089	Silybum marianum	Korea
90	912090	Silybum marianum	Korea
91	912091	Silybum marianum	Korea
92	912092	Silybum marianum	Korea
93	912093	Silybum marianum	Korea
94	912094	Silybum marianum	Korea
95	912095	Silybum marianum	Korea
96	912096	Silybum marianum	Korea
97	912097	Silybum marianum	Korea
98	912098	Silybum marianum	Korea
99	912099	Silybum marianum	Korea
100	912100	Silybum marianum	Korea
101	912101	Silybum marianum	Korea
102	912102	Silybum marianum	Korea
103	912103	Silybum marianum	Korea
104	912104	Silybum marianum	Korea
105	912105	Silybum marianum	Korea
106	912106	Silybum marianum	Korea
107	912107	Silybum marianum	Korea
108	912108	Silybum marianum	Korea
109	912109	Silybum marianum	Korea
110	912110	Silybum marianum	Korea
111	912111	Silybum marianum	Korea
112	912112	Silybum marianum	Korea
113	912113	Silybum marianum	Korea
114	912114	Silybum marianum	Korea
115	912115	Silybum marianum	Korea
116	912116	Silybum marianum	Korea
117	912117	Silybum marianum	Korea
118	912118	Silybum marianum	Korea
119	912119	Silybum marianum	Korea
120	912120	Silybum marianum	Korea
121	912121	Silybum marianum	Korea
122	912122	Silybum marianum	Korea
123	912123	Silybum marianum	Korea
124	912124	Silybum marianum	Korea
125	912125	Silybum marianum	Korea
126	912126	Silybum marianum	Korea
127	912127	Silybum marianum	Korea
128	912128	Silybum marianum	Korea
129	912129	Silybum marianum	Korea
130	912130	Silybum marianum	Korea
131	912131	Silybum marianum	Korea
132	912132	Silybum marianum	Korea
133	912133	Silybum marianum	Korea
134	912134	Silybum marianum	Korea
135	912135	Silybum marianum	Korea
136	912136	Silybum marianum	Korea
137	912137	Silybum marianum	Korea
138	912138	Silybum marianum	Korea
139	912139	Silybum marianum	Korea
140	912140	Silybum marianum	Korea
141	912141	Silybum marianum	Korea
142	912142	Silybum marianum	Korea
143	912143	Silybum marianum	Korea
144	912144	Silybum marianum	Korea
145	912145	Silybum marianum	Korea
146	912146	Silybum marianum	Korea
147	912147	Silybum marianum	Korea
148	912148	Silybum marianum	Korea
149	912149	Silybum marianum	Korea
150	912150	Silybum marianum	Korea
151	912151	Silybum marianum	Korea
152	912152	Silybum marianum	Korea
153	912153	Silybum marianum	Korea
154	912154	Silybum marianum	Korea
155	912155	Silybum marianum	Korea
156	912156	Silybum marianum	Korea
157	912157	Silybum marianum	Korea
158	912158	Silybum marianum	Korea
159	912159	Silybum marianum	Korea
160	912160	Silybum marianum	Korea
161	912161	Silybum marianum	Korea
162	912162	Silybum marianum	Korea
163	912163	Silybum marianum	Korea
164	912164	Silybum marianum	Korea
165	912165	Silybum marianum	Korea
166	912166	Silybum marianum	Korea
167	912167	Silybum marianum	Korea
168	912168	Silybum marianum	Korea
169	912169	Silybum marianum	Korea
170	912170	Silybum marianum	Korea
171	912171	Silybum marianum	Korea
172	912172	Silybum marianum	Korea
173	932002	Silybum marianum	unknown	K026676
174	932005	Silybum marianum	unknown	K026676
175	932007	Silybum marianum	unknown	K026676
176	932008	Silybum marianum	unknown	K026676
177	932010	Silybum marianum	Canada	K001033
178	932012	Silybum marianum	Canada	K001033
179	932013	Silybum marianum	Canada	K001033
180	932014	Silybum marianum	Canada	K001033
181	932015	Silybum marianum	Canada	K001033
182	932016	Silybum marianum	Canada	K001033
183	932017	Silybum marianum	Canada	K001033
184	932018	Silybum marianum	Canada	K001033
185	932020	Silybum marianum	Colombia	K173170
186	932021	Silybum marianum	Colombia	K173170
187	932022	Silybum marianum	Colombia	K173170
188	932023	Silybum marianum	Colombia	K173170
189	932024	Silybum marianum	Colombia	K173170
190	932027	Silybum marianum	Colombia	K173170
191	932028	Silybum marianum	Colombia	K173170
192	932029	Silybum marianum	Colombia	K173170
193	932030	Silybum marianum	Colombia	K173170
194	932031	Silybum marianum	Germany	K044886
195	932032	Silybum marianum	Germany	K044886
196	932033	Silybum marianum	Germany	K044886
197	932034	Silybum marianum	Germany	K044886
198	932035	Silybum marianum	Germany	K044886
199	932036	Silybum marianum	Germany	K044886
200	932037	Silybum marianum	Germany	K044886
201	932038	Silybum marianum	Germany	K044886
202	932039	Silybum marianum	Germany	K044886
203	932040	Silybum marianum	Germany	K044886
204	932041	Silybum marianum	North Korea	K153821
205	932042	Silybum marianum	North Korea	K153821
206	932044	Silybum marianum	North Korea	K153821
207	932045	Silybum marianum	North Korea	K153821
208	932046	Silybum marianum	North Korea	K153821
209	932049	Silybum marianum	Moldova	K227004
210	932050	Silybum marianum	Moldova	K227004
211	932051	Silybum marianum	Moldova	K227004
212	932052	Silybum marianum	Moldova	K227004
213	932053	Silybum marianum	Moldova	K227004
214	932054	Silybum marianum	Moldova	K227004
215	932055	Silybum marianum	Moldova	K227004
216	932056	Silybum marianum	Moldova	K227004
217	932057	Silybum marianum	Moldova	K227004
218	932058	Silybum marianum	Moldova	K227004
219	932059	Silybum marianum	Moldova	K227004
220	932060	Silybum marianum	Moldova	K227004
